# Supplementary material for: Comparative Transcriptome Analysis in Monocyte-Derived Macrophages of Asymptomatic GBA Mutation Carriers and Patients with GBA-Associated Parkinson’s Disease
Source: MDPI journal article supplement (doi:10.3390/genes12101545), 2021-09-29
Supplement: s1 [file s1]

**Table S 1.** Post-trimming and mapping results to reference genome for all groups

| Total reads         | Mapping reads | Mapping >1 time | Mapping 1 time | Mapping 0 time |
|---------------------|---------------|-----------------|----------------|----------------|
| <b>GBA-PD</b>       |               |                 |                |                |
| 12245034            | 94.47%        | 1390912         | 10177533       | 676589         |
| 12534145            | 94.15%        | 1522375         | 10278974       | 732796         |
| 13364587            | 96.02%        | 1616992         | 11215592       | 532003         |
| 14588079            | 96.17%        | 1520881         | 12507829       | 559369         |
| 22038017            | 95.96%        | 2889324         | 18258227       | 890466         |
| <b>GBA-carriers</b> |               |                 |                |                |
| 16815993            | 94.19%        | 1868206         | 13970248       | 977539         |
| 20016766            | 96.44%        | 2595136         | 16708395       | 713235         |
| 11328352            | 95.71%        | 1415542         | 9427273        | 485537         |
| 15042608            | 95.42%        | 2338602         | 12014382       | 689624         |
| <b>Controls</b>     |               |                 |                |                |
| 13186256            | 94.77%        | 1922697         | 10573358       | 690201         |
| 12888917            | 94.42%        | 1349391         | 10820389       | 719137         |
| 29105091            | 96.34%        | 2980649         | 25060066       | 1064376        |
| 13276643            | 95.33%        | 1916805         | 10740334       | 619504         |

*GBA-PD* - Parkinson's disease associated with mutations in the *GBA* gene; *GBA-carriers* - asymptomatic *GBA* mutation carriers

**Table S 2.** Differentially expressed genes from L444P/N *GBA*-PD patients compared to controls in monocyte-derived macrophages

| DEGs           | padj                   | log2FoldChange |
|----------------|------------------------|----------------|
| <i>JUNB</i>    | $1.56 \times 10^{-8}$  | -1.273329      |
| <i>HOOK2</i>   | $2.39 \times 10^{-7}$  | -1.109320      |
| <i>EGR1</i>    | $3.17 \times 10^{-6}$  | -4.187828      |
| <i>DUSP1</i>   | $3.95 \times 10^{-6}$  | -3.25103       |
| <i>IL6</i>     | $3.95 \times 10^{-6}$  | -3.4155        |
| <i>ARL4C</i>   | $5.06 \times 10^{-6}$  | -2.147519      |
| <i>NR4A2</i>   | $2.94 \times 10^{-4}$  | -3.001167      |
| <i>CCL3L1</i>  | $4.026 \times 10^{-4}$ | -5.2936939     |
| <i>PPBP</i>    | 0.00123                | 7.01866736     |
| <i>RPL18</i>   | 0.00149                | -0.724112      |
| <i>IER2</i>    | 0.003892               | -2.148075      |
| <i>TRBV5-1</i> | 0.00389                | -2.648457      |

|                   |           |             |
|-------------------|-----------|-------------|
| <i>CXCL2</i>      | 0.00412   | -2.436204   |
| <i>MAL</i>        | 0.00412   | -3.526525   |
| <i>MMP7</i>       | 0.0052    | 3.5695832   |
| <i>CCL3</i>       | 0.0052    | -2.8581180  |
| <i>DUSP2</i>      | 0.00665   | -2.0777352  |
| <i>ATP2B1-AS1</i> | 0.0087    | -2.08186683 |
| <i>CCL4</i>       | 0.0095    | -3.10118915 |
| <i>CCL4L2</i>     | 0.0111    | -4.86057595 |
| <i>MIR34AHG</i>   | 0.0123    | 1.293966592 |
| <i>KIAA0319</i>   | 0.0173    | 2.7304552   |
| <i>JUN</i>        | 0.0202    | -1.8078662  |
| <i>TPTEP1</i>     | 0.0246    | 2.2196251   |
| <i>ZFP36</i>      | 0.03487   | -1.5978346  |
| <i>IER3</i>       | 0.0348    | -1.26935    |
| <i>TTLL4</i>      | 0.0412    | 0.89197963  |
| <i>COLEC12</i>    | 0.0412    | -2.26691    |
| <i>CXCL5</i>      | 0.041     | 2.862093    |
| <i>ENPP2</i>      | 0.0427    | -3.299636   |
| <i>ABHD2</i>      | 0.0427133 | 0.90893     |
| <i>HSPA1B</i>     | 0.042713  | 0.996150    |

*GBA-PD* - Parkinson's disease associated with mutations in the *GBA* gene; *GBA-carriers* - asymptomatic *GBA* mutation carriers; *DEGs* - differentially expressed genes

**Table S 3.** Differentially expressed genes from L444P/N *GBA*-carriers compared to controls in monocyte-derived macrophages

| <b>DEGs</b>      | <b>padj</b>            | <b>log2FoldChange</b> |
|------------------|------------------------|-----------------------|
| <i>IL31RA</i>    | $9.87 \times 10^{-18}$ | -19.44049             |
| <i>ACOD1</i>     | $4.78 \times 10^{-14}$ | -18.67938             |
| <i>PRSS22</i>    | $4.94 \times 10^{-6}$  | -19.411937            |
| <i>LINC01891</i> | $4.055 \times 10^{-4}$ | -18.4905145           |
| <i>ATP1B4</i>    | $4.70 \times 10^{-4}$  | -21.902312            |
| <i>TBX3</i>      | $4.70 \times 10^{-4}$  | -21.694237            |

|                 |            |             |
|-----------------|------------|-------------|
| <i>VATIL</i>    | 0.00100337 | -16.8595347 |
| <i>NXPH3</i>    | 0.0013055  | -20.8813694 |
| <i>MT1M</i>     | 0.0014474  | -7.5301355  |
| <i>SHC4</i>     | 0.002294   | -20.309837  |
| <i>HLA-J</i>    | 0.002965   | 3.1020326   |
| <i>SPRY4</i>    | 0.004660   | -4.39827985 |
| <i>KCNMB1</i>   | 0.008565   | -2.8714975  |
| <i>JAKMIP2</i>  | 0.0094078  | 1.4094559   |
| <i>OSCAR</i>    | 0.0098210  | -1.30014117 |
| <i>KIAA0319</i> | 0.016259   | 3.2499566   |
| <i>FGL2</i>     | 0.0314813  | -2.086525   |

*GBA-PD - Parkinson's disease associated with mutations in the GBA gene; GBA-carriers - asymptomatic GBA mutation carriers; DEGs - differentially expressed genes*

**Table S 4.** Differentially expressed genes from L444P/N GBA-PD patients compared to GBA-carriers in monocyte-derived macrophages

| <b>DEGs</b>   | <b>padj</b>            | <b>log2FoldChange</b> |
|---------------|------------------------|-----------------------|
| <i>IL31RA</i> | $3.42 \times 10^{-28}$ | 22.81419              |
| <i>ACOD1</i>  | $4.92 \times 10^{-24}$ | 22.49465              |
| <i>VATIL</i>  | $1.62 \times 10^{-7}$  | 21.26457              |
| <i>ATP1B4</i> | $1.77 \times 10^{-7}$  | 26.877062             |
| <i>PRSS22</i> | $3.74 \times 10^{-7}$  | 20.0742               |
| <i>MT1M</i>   | $5.64 \times 10^{-7}$  | 9.60953               |
| <i>SHC4</i>   | $1.52 \times 10^{-5}$  | 23.66668              |
| <i>UTS2R</i>  | $4.197 \times 10^{-5}$ | 18.4369               |
| <i>NXPH3</i>  | $4.62 \times 10^{-5}$  | 22.674242             |
| <i>KCNMB1</i> | $7.34 \times 10^{-5}$  | 3.408771              |
| <i>FGD5</i>   | $7.34 \times 10^{-5}$  | 3.005397              |
| <i>TBX3</i>   | $1.57 \times 10^{-4}$  | 21.40274              |
| <i>MT1F</i>   | $1.87 \times 10^{-4}$  | 3.56241               |
| <i>HSPH1</i>  | $2.75 \times 10^{-4}$  | 0.75877               |
| <i>SPRY4</i>  | $3.032 \times 10^{-4}$ | 4.830094              |
| <i>KCNJ2</i>  | $4.24 \times 10^{-4}$  | 2.810203              |

|                  |                        |             |
|------------------|------------------------|-------------|
| <i>MT1L</i>      | $5.049 \times 10^{-4}$ | 6.71591     |
| <i>LINC01891</i> | 0.0010437551433765133  | 16.980      |
| <i>ARL4C</i>     | 0.0011152363202132764  | -1.954802   |
| <i>DUSP1</i>     | 0.002709               | -2.793141   |
| <i>OSCAR</i>     | 0.004080               | 1.2904701   |
| <i>TGM2</i>      | 0.007633753            | 2.083364    |
| <i>SRSF5</i>     | 0.008446               | -0.616122   |
| <i>UNC5B</i>     | 0.010984               | 2.2372      |
| <i>BATF2</i>     | 0.0218465              | 2.8215      |
| <i>MT1X</i>      | 0.027678               | 3.16545     |
| <i>SLC39A8</i>   | 0.0284                 | 2.780923830 |
| <i>ZNF704</i>    | 0.03119                | -2.44145    |
| <i>CALHM6</i>    | 0.03119                | 4.1001527   |
| <i>STON2</i>     | 0.0320245              | -5.194386   |
| <i>SERPINH1</i>  | 0.035644               | 0.92875318  |
| <i>LIPM</i>      | 0.036739               | 9.097984    |
| <i>RNF144B</i>   | 0.03789                | 1.6824349   |
| <i>NT5C3B</i>    | 0.0378908              | -1.271271   |
| <i>SNHG3</i>     | 0.04101556             | -0.962452   |

*GBA-PD* - Parkinson's disease associated with mutations in the *GBA* gene; *GBA-carriers* - asymptomatic *GBA* mutation carriers; *DEGs* - differentially expressed genes

**Table S 5.** Differentially expressed genes from *GBA-PD* (L444P/N+N370S/N) patients compared to controls in monocyte-derived macrophages

| <b>DEGs</b>  | <b>padj</b>            | <b>log2FoldChange</b> |
|--------------|------------------------|-----------------------|
| <i>JUNB</i>  | $2.37 \times 10^{-12}$ | -1.253670176          |
| <i>HOOK2</i> | $2.88 \times 10^{-9}$  | -1.071183696          |
| <i>EGR1</i>  | $4.68 \times 10^{-6}$  | -4.119209619          |
| <i>ARL4C</i> | $1.07 \times 10^{-5}$  | -2.025843567          |
| <i>NR4A2</i> | $3.91 \times 10^{-5}$  | -2.986036049          |
| <i>IL6</i>   | $6.95 \times 10^{-5}$  | -3.866493754          |
| <i>DUSP1</i> | 0.000139485            | -3.369818756          |

|                |             |              |
|----------------|-------------|--------------|
| <i>MMP7</i>    | 0.000489067 | 3.915533725  |
| <i>CCL3L1</i>  | 0.000770649 | -5.74901087  |
| <i>PPBP</i>    | 0.000821926 | 6.654290865  |
| <i>TRBV5-1</i> | 0.001747096 | -2.531049969 |
| <i>RPL18</i>   | 0.001949174 | -0.703837045 |
| <i>IER2</i>    | 0.00485697  | -2.103641578 |
| <i>TPTEP1</i>  | 0.005948528 | 2.203616802  |
| <i>ZFP36</i>   | 0.007195823 | -1.668224122 |
| <i>TRIM13</i>  | 0.00850527  | 0.725108438  |
| <i>ENPP2</i>   | 0.009314153 | -3.404150223 |
| <i>VMP1</i>    | 0.012172779 | 0.624239627  |
| <i>CCL4L2</i>  | 0.01305784  | -5.208863091 |
| <i>BCL6</i>    | 0.0210965   | 0.756069963  |
| <i>CCL3</i>    | 0.021273736 | -2.691408178 |
| <i>COLEC12</i> | 0.02135696  | -2.182528256 |
| <i>MAL</i>     | 0.02135696  | -3.03596868  |
| <i>CXCL2</i>   | 0.027199467 | -2.713284496 |
| <i>SLC4A8</i>  | 0.03342678  | 1.181900735  |
| <i>CYP4V2</i>  | 0.035836308 | 0.789161862  |
| <i>SKIL</i>    | 0.039183179 | 0.637145847  |
| <i>DOCK5</i>   | 0.045685169 | 1.06312728   |

**Table S 6.** Differentially expressed genes from GBA-carriers (L444P/N+N370S/N) compared to controls in monocyte-derived macrophages

| DEGs             | padj                   | log2FoldChange |
|------------------|------------------------|----------------|
| <i>IL31RA</i>    | $2.36 \times 10^{-18}$ | -17.683476     |
| <i>ACOD1</i>     | $2.88 \times 10^{-18}$ | -18.210591     |
| <i>NXPH3</i>     | $1.77 \times 10^{-16}$ | -29.984238     |
| <i>LINC01891</i> | $3.37 \times 10^{-16}$ | -29.999458     |
| <i>VAT1L</i>     | 0.00032722             | -14.087655     |
| <i>ATP5PDP3</i>  | 0.00045205             | 18.7100791     |

|              |            |            |
|--------------|------------|------------|
| <i>JUNB</i>  | 0.00046733 | −0.8331051 |
| <i>HOOK2</i> | 0.00632252 | −0.7218695 |

*GBA-PD* - Parkinson's disease associated with mutations in the *GBA* gene; *GBA-carriers* - asymptomatic *GBA* mutation carriers; *DEGs* - differentially expressed genes

**Table S 7.** Differentially expressed genes from *GBA-PD* (L444P/N+N370S/N) patients compared to *GBA-carriers* (L444P/N+N370S/N) in monocyte-derived macrophages

| <b>DEGs</b>         | <b>padj</b>            | <b>log2FoldChange</b> |
|---------------------|------------------------|-----------------------|
| <i>ACOD1</i>        | $1.43 \times 10^{-30}$ | 21.1020452            |
| <i>IL31RA</i>       | $2.00 \times 10^{-28}$ | 19.8053162            |
| <i>IFNB1</i>        | $1.40 \times 10^{-12}$ | −30.807576            |
| <i>ARL4C</i>        | 0.00087384             | −1.6917533            |
| <i>TGM2</i>         | 0.00087384             | 2.14653337            |
| <i>BCL6</i>         | 0.00664798             | 0.82786078            |
| <i>DEPP1</i>        | 0.00664798             | 1.83107981            |
| <i>RPL18</i>        | 0.00795303             | −0.6557988            |
| <i>STON2</i>        | 0.00996956             | −4.4615928            |
| <i>KCNE1</i>        | 0.01102564             | 2.05763841            |
| <i>YPEL4</i>        | 0.01374026             | 1.92204556            |
| <i>LOC100507642</i> | 0.01643034             | 1.07536814            |
| <i>TPTEP1</i>       | 0.02159264             | 2.03424689            |
| <i>KLF2</i>         | 0.02159264             | −1.8023782            |
| <i>CXCL5</i>        | 0.03068743             | 2.88289408            |
| <i>DUSP1</i>        | 0.03965958             | −2.4511962            |
| <i>COLEC12</i>      | 0.03965958             | −2.0787807            |
| <i>CHST15</i>       | 0.03965958             | 0.77291653            |
| <i>TRIM13</i>       | 0.03965958             | 0.65318516            |
| <i>BTBD19</i>       | 0.03965958             | 1.89239807            |
| <i>HDGFL3</i>       | 0.04210421             | 1.05565628            |
| <i>RPL6P19</i>      | 0.04210421             | −1.2254401            |
| <i>ABCC6</i>        | 0.04819162             | 1.71221141            |

*GBA-PD* - Parkinson's disease associated with mutations in the *GBA* gene; *GBA-carriers* - asymptomatic *GBA* mutation carriers; *DEGs* - differentially expressed genes

**Table S 8.** Functional clusters selected according to the results of GO analysis between GBA-PD (L444P/N+N370S/N) patients, GBA-carriers (L444P/N+N370S/N) and controls

|                                                                   | [GO ID] GO term                                              | p <sub>adjusted</sub> | DEGs                                                                                       |      |
|-------------------------------------------------------------------|--------------------------------------------------------------|-----------------------|--------------------------------------------------------------------------------------------|------|
| <b>GBA-PD (L444P/N+N370S/N) vs controls</b>                       |                                                              |                       |                                                                                            |      |
| GBA-                                                              | [GO:0010941] regulation of cell death                        | 0.039                 | <i>BCL6, CCL3, DUSP1, EGR1, IL6, MAL, NR4A2, SKIL, TRIM13, ZFP36</i>                       | PD - |
|                                                                   | [GO:0010942] positive regulation of cell death               | 0.0023                | <i>BCL6, CCL3, DUSP1, EGR1, IL6, MAL, SKIL, TRIM13</i>                                     |      |
|                                                                   | [GO:0006935] chemotaxis                                      | 0.0015                | <i>CCL3, CCL3L1, CCL4L1, CXCL2, DUSP1, ENPP2, IL6, PPBP</i>                                |      |
|                                                                   | [GO:0006954] inflammatory response                           | 0.0041                | <i>BCL6, CCL3, CCL3L1, CCL4L1, CXCL2, IL6, PPBP, ZFP36</i>                                 |      |
|                                                                   | [GO:0034097] response to cytokine                            | $2.11 \times 10^{-6}$ | <i>BCL6, CCL3, CCL3L1, CCL4L1, CXCL2, DUSP1, EGR1, HOOK2, IL6, JUNB, PPBP, SKIL, ZFP36</i> |      |
|                                                                   | [GO:0030595] leukocyte chemotaxis                            | $1.77 \times 10^{-5}$ | <i>CCL3, CCL3L1, CCL4L1, CXCL2, DUSP1, IL6, PPBP</i>                                       |      |
|                                                                   | [GO:0097529] myeloid leukocyte migration                     | $1.31 \times 10^{-5}$ | <i>CCL3, CCL3L1, CCL4L1, CXCL2, DUSP1, IL6, PPBP</i>                                       |      |
|                                                                   | [GO:0019221] cytokine-mediated signaling pathway             | 0.00054               | <i>BCL6, CCL3, CCL3L1, CCL4L1, CXCL2, EGR1, IL6, JUNB, PPBP</i>                            |      |
|                                                                   | [GO:0005125] cytokine activity                               | 0.00046               | <i>CCL3, CCL3L1, CCL4L1, CXCL2, IL6, PPBP</i>                                              |      |
|                                                                   | [GO:0002548] monocyte chemotaxis                             | $1.67 \times 10^{-5}$ | <i>CCL3, CCL3L1, CCL4L1, DUSP1, IL6</i>                                                    |      |
|                                                                   | [GO:0048247] lymphocyte chemotaxis                           | 0.033                 | <i>CCL3, CCL3L1, CCL4L1</i>                                                                |      |
|                                                                   | [GO:1990869] cellular response to chemokine                  | $1.85 \times 10^{-6}$ | <i>CCL3, CCL3L1, CCL4L1, CXCL2, DUSP1, PPBP</i>                                            |      |
| <b>GBA-PD (L444P/N+N370S/N) vs GBA-carriers (L444P/N+N370S/N)</b> |                                                              |                       |                                                                                            |      |
|                                                                   | [GO:0042092] type 2 immune response                          | 0.00093               | <i>BCL6, IFNB1, IL31RA</i>                                                                 |      |
|                                                                   | [GO:0002520] immune system development                       | 0.047                 | <i>ACOD1, BCL6, IFNB1, IL31RA, KLF2, STON2</i>                                             |      |
|                                                                   | [GO:0002367] cytokine production involved in immune response | 0.025                 | <i>BCL6, IFNB1, IL31RA</i>                                                                 |      |
|                                                                   | [GO:0001818] negative regulation of cytokine production      | 0.019                 | <i>ACOD1, BCL6, IFNB1, KLF2</i>                                                            |      |
|                                                                   | [GO:0071345] cellular response to cytokine stimulus          | 0.0095                | <i>ACOD1, BCL6, CXCL5, DUSP1, IFNB1, IL31RA, KLF2</i>                                      |      |
|                                                                   | [GO:0006952] defense response                                | 0.022                 | <i>ACOD1, BCL6, COLEC12, CXCL5, IFNB1, IL31RA, TGM2, TRIM13</i>                            |      |
| <b>GBA-carriers (L444P/N+N370S/N) vs controls</b>                 |                                                              |                       |                                                                                            |      |
|                                                                   | [GO:0071345] cellular response to cytokine stimulus          | 0.0032                | <i>ACOD1, HOOK2, IL31RA, JUNB</i>                                                          |      |

*Parkinson's disease associated with mutations in the GBA gene; GBA-carriers - asymptomatic GBA mutation carriers; DEGs - differentially expressed genes*
